# Supplementary material for: Decline of a Rare Moth at Its Last Known English Site: Causes and Lessons for Conservation
Source: PLoS One. 2016 Jun 22;11(6):e0157423. doi: 10.1371/journal.pone.0157423 (PMC4917207; doi:10.1371/journal.pone.0157423)
Supplement: S1 Dataset — (XLS) [file pone.0157423.s003.xls]

## Sheet: Transect Data
Numbers of adult Epione vespertaria are shown.
		D = David Baker; T = Terry Crawford; PM = Peter Mayhew; PR = Penny Relf; B = Barry Graham; x = not walked																Later walk			x=section not walked
		2007 sections					1	2	3				5	6	7	8	9
		2008-14 sections					1	2	3	4	5	6	7	8	9	10	11		Total		Total without 4,5,6		No. in burnt S3
	Julian	Date	Start	Temp.
	171	2007-06-20	07.30	17	T														0
	173	2007-06-22	07.30	17	T								2						2
	180	2007-06-29	07.25	12	D		x	x	x										0
	181	2007-06-30	07.30	15	T								1						1
	183	2007-07-02	07.15	15	T		1	3	6				2	1					13
	189	2007-07-08	07.15	14	D				6						1		1		8
	191	2007-07-10	07.45	13	T			7	10				6						23
	194	2007-07-13	07.35	14	D		2	17	39				8		1				67
	197	2007-07-16	07.30	13	T		5	30	53				9		1				98						1 female in section 2
	201	2007-07-20	07.08	17	D		2	14	10										26
	204	2007-07-23	07.45	15	T		2	19	30				2						53
	208	2007-07-27	07.00	16	D			1											1
	211	2007-07-30	07.30	13	T				1										1
							12	91	155	0	0	0	30	1	3	0	1		293
	177	2008-06-26	07.30	15	T														0		0
	181	2008-06-30	07.30	14	T														0		0
	185	2008-07-04	07.30	12	T														0		0
	187	2008-07-06	07.30	14	T														0		0
	190	2008-07-09	07.45	13.5	T		1		7		1		1						10		9
	192	2008-07-11	07.18	17	D				14		2				x	x	x		16		14
	194	2008-07-13	08.00	15	T		1	4	24		4		4	2	5		1		45		41
	199	2008-07-18	07.15	15	D		1							1	3				5		5
	201	2008-07-20	07.45	12	T			1						2	1	2			6		6
		2008-07-20	09.45	12.5	T			5	17	x	x	x	x	x	x	x	x		22		22
	202	2008-07-21	08.00	11.5	T														0		0
		2008-07-21	09.45	13	T			12	37		9		3	1	2				64		55
	204	2008-07-23	07.45	14.5	T			3	9		7	3	6	4	6		1		39		29
		2008-07-23	10.00	15.5	T		2	16	19		5	1	2						45		39				1 female in section 5
	206	2008-07-25	07.15	17	D			12	20	3	9	6		2	1	1			54		36
		2008-07-25	09.10	20+	D			3	4		2								9		7
	209	2008-07-28	08.00	16	T			23	26		5		2			1			57		52				1 female in section 2
	214	2008-08-02	07.05	16	D														0		0
	215	2008-08-03	07.50		Nick Lawman				20										20		20
	216	2008-08-04	08.15	14.5	T				2			1			x	x	x		3		2
	217	2008-08-05	07.45	12.5	T														0		0
		2008-08-05	09.45	13	T			1	6			1							8		7
	223	2008-08-11	08.00	15.5	T				2										2		2
		2008-08-11	10.00	15.5	T					x	x	x	x	x	x	x	x		0		0
	227	2008-08-15	08.00	13	T														0		0
							5	80	207	3	44	12	18	12	18	4	2		405		346
	181	2009-06-30	08.00	16	T			3	1										4		4
	184	2009-07-03	07.25	19	D			11	10		2								23		21
	187	2009-07-06	08.00	16	T			7	31				2						40		40
	190	2009-07-09	07.30	14	D				6		1				x	x	x		7		6
		2009-07-09	08.55	16	D			3	47		4	6	3						63		53
	194	2009-07-13	08.15	16	T			3	44	4	14	9	2						76		49
	197	2009-07-16	08.20	18	D			9	36	1	9	2			x	x	x		57		45
	201	2009-07-20	08.15	15	T			8	11		1								20		19
		2009-07-20	10.00	16	T			2	11		1								14		13
	205	2009-07-24	08.00	16	D				2										2		2
	209	2009-07-28	08.15	14	T				6										6		6
		2009-07-28	10.00	14.5	T			2	4										6		6
							0	48	209	5	32	17	7	0	0	0	0		318		264
	176	2010-06-25	08.00	14.5	T		:												0		0
	183	02/07.2010	08.00	15	T			1									1		2		2
	188	2010-07-07	07.25	17	D				8	2	2				x	x	x		12		8
	192	2010-07-11	08.00	18	T														0		0
	195	2010-07-14	07.10	17	D				18	9	7	1			x	x	x		35		18
		2010-07-14	08.00	18	D				16		1	1			x	x	x		18		16
	200	2010-07-19	08.15	17	T			2	12			1	2						17		16
	203	2010-07-22	08.15	14.5	T				3		1		1						5		4
	206	2010-07-25	08.15	18	T			1	1		1								3		2
							0	4	58	11	12	3	3	0	0	0	1		92		66		No. in burnt S3
	170	2011-06-19	09.00	13	T														0		0
	173	2011-06-22	10.00	18	D				3						x	x	x		3		3		0
	177	2011-06-26	08.30	17	T				2										2		2		0
	180	2011-06-29	07.10	13	D										x	x	x		0		0
		2011-06-29	08.45		D				8	x	x	x	x	x	x	x	x		8		#VALUE!		0
	182	2011-07-01	08.00	11.5	T				1		1								2		1		0
	187	2011-07-06	07.25	16	D			1	7			1		1	x	x	x		10		9		0
		2011-07-06	08.35	17	D			1	1	x	x	x	x	x	x	x	x		2		#VALUE!		0		1 female in section 2
	191	2011-07-10	08.30	14.5	T				14		3		1						18		15		4
	194	2011-07-13	07.20	12	D										x	x	x		0		0
		2011-07-13	08.40	15	D		x		14	x	x	x	x	x	x	x	x		14		#VALUE!		0
	200	2011-07-19	08.30	15	T				2		1								3		2		0
	201	2011-07-20	07.45	15	D				1	3	2				x	x	x		6		1		0
	205	2011-07-24	08.30	12	T			1											1		1
	206	2011-07-25	08.30	11.5	T				1				1						2		2		0
	207	2011-07-26	09.10	17	D				1						x	x	x		1		1		0
	210	2011-07-29	08.30	14	T														0		0
							0	3	55	3	7	1	2	1	0	0	0		72		37	0	4
	183	2012-07-02	08.30	13	T														0		0
	185	2012-07-04	07.30	?	D										x	x	x		0		0
	186	2012-07-05	08.30	17	T														0		0
	189	2012-07-08	08.45	14	T														0		0
	192	2012-07-11	07.15	14	D				1						x	x	x		1		1		0
	193	2012-07-12	07.30	15	D with D.Grundy				4							x	x		4		4		0
	196	2012-07-15	08.30	13.5	T						1								1		0
	198	2012-07-17	08.15	16	T				1										1		1		1
	199	2012-07-18	08.15	15	D				3	1					x	x	x		4		3		0
	203	2012-07-22	09.15	15.5	T				4										4		4		0
	205	2012-07-24	08.15	19	T						1			1					2		1				1 female in section 8
	206	2012-07-25	08.00	?	D				5						x	x	x		5		5		0
	208	2012-07-27	08.45	16	T				3										3		3		0
	212	2012-07-31	09.00	13	T				5	1		1							7		5		0
	214	2012-08-02	08.45	15	T				4					1					5		5		0
	217	2012-08-05	08.30	12.5	T				5				1						6		6		0
	219	2012-08-07	08.30	15	T				3										3		3		1
	221	2012-08-09	08.45	14.5	T				1										1		1		0
	224	2012-08-12	08.30	16	T														0		0
							0	0	39	2	2	1	1	2	0	0	0		47		42		2
	181	2013-06-30	09.00	16	T														0		0
	184	2013-07-03	07.10	?	D										x	x	x		0		0
	187	2013-07-06	08.00	20	PM														0		0
	188	2013-07-07	08.30	18	T														0		0
	191	2013-07-10	09.15	?	D/PR										x	x	x		0		0
	193	2013-07-12	08.45	17.5	T				3		2								5		3		1
	194	2013-07-13	07.20	18	D				3						x	x	x		3		3		0
		2013-07-13	09.25	20+	D				1						x	x	x		1		1		0
	194	2013-07-13	08.00	23	PM				7					1					8		8		0
	197	2013-07-16	09.30	19	T				6				1	1					8		8		5
	198	2013-07-17	07.25	18	D				5		2	2		2	x	x	x		11		7		<=4
	201	2013-07-20	07.35	18	PM				4					2					6		6		1
	205	2013-07-24	07.25	18	D				5		3				x	x	x		8		5		<=3
	208	2013-07-27	07.30	19	PM						1		1	1					3		2
	212	2013-07-31	07.35	?	D										x	x	x		0		0
	214	2013-08-02	09.00	20	T														0		0
							0	0	34	0	8	2	2	7	0	0	0		53		43		7 + <=7
	172	2014-06-21	07.45	20	PM														0		0
	176	2014-06-25	09.05	18	PR														0		0
	180	2014-06-29	08.00	14	PM/B														0		0
	183	2014-07-02	09.00	15.5	T				1										1		1		1
	186	2014-07-05	08.40	14	B/PM														0		0
	187	2014-07-06	09.30	18	PR				5	1									6		5		3		2 females in section 3
	190	2014-07-09	08.35	16	B														0		0
	193	2014-07-12	08.50	21	PR				4	1					x	x	x		5		4		4		1 female in section 3
	194	2014-07-13	08.45	17	T				5					1	x	x	x		6		5		5
	197	2014-07-16	08.25	18	B								4						4		4
	199	2014-07-18	09.00	19	T														0		0
	201	2014-07-20	07.35	18	PM				2										2		2
	204	2014-07-23	08.45	20	B														0		0
	207	2014-07-26	07.35	18.5	PM														0		0
	211	2014-07-30	08.35	18	B														0		0
							0	0	17	2	0	0	4	1	0	0	0		24		21		13
																			1304			1102 male, 8 female, 194 unsexed

## Sheet: 2013 patch locations 
Locations of every Salix repens patch along the monitoring transect route in 2013 are shown
Transect Section	Latitude	Longitude
1	54.0391	-1.00787
	54.0391	-1.00795
	54.0391	-1.00787
2	54.0399	-1.00602
	54.0399	-1.00602
	54.0401	-1.00571
	54.0401	-1.00571
	54.0401	-1.00568
	54.0401	-1.00544
	54.0401	-1.00543
	54.0401	-1.00542
	54.0401	-1.00542
	54.0401	-1.00542
	54.0402	-1.00544
3 Left (Burnt)	54.0403	-1.00541
	54.0403	-1.00542
	54.0405	-1.00525
	54.0406	-1.00508
	54.0406	-1.00499
	54.0406	-1.00502
	54.0406	-1.00503
	54.0406	-1.00503
	54.0406	-1.00506
	54.0406	-1.005
	54.0406	-1.00499
	54.0406	-1.005
	54.0406	-1.00499
	54.0406	-1.00496
	54.0406	-1.00494
	54.0406	-1.00497
	54.0407	-1.00499
	54.0406	-1.00492
	54.0406	-1.00492
	54.0406	-1.00492
	54.0406	-1.00491
	54.0406	-1.00489
	54.0406	-1.00493
	54.0407	-1.00498
	54.0407	-1.00493
	54.0407	-1.00494
	54.0406	-1.00486
	54.0407	-1.0049
	54.0407	-1.00488
	54.0407	-1.00484
	54.0407	-1.00481
	54.0407	-1.0048
	54.0407	-1.00477
	54.0407	-1.0048
	54.0408	-1.00479
	54.0408	-1.00469
	54.0408	-1.00466
	54.0408	-1.00455
3 Left hand side (unburnt)	54.0407	-1.00468
	54.0407	-1.00466
	54.0408	-1.00471
	54.0409	-1.00467
	54.0408	-1.00464
	54.0409	-1.00461
	54.0408	-1.00451
	54.0408	-1.00453
	54.0408	-1.0045
	54.0408	-1.00446
	54.0409	-1.00447
	54.0409	-1.00449
	54.0409	-1.00449
	54.0409	-1.00439
	54.0409	-1.00438
	54.0409	-1.00438
	54.0409	-1.00439
	54.0409	-1.00441
	54.0409	-1.00441
	54.0409	-1.00432
	54.041	-1.00432
	54.041	-1.00432
	54.041	-1.00435
	54.041	-1.00433
	54.041	-1.00432
	54.041	-1.00432
	54.041	-1.00432
	54.041	-1.00432
	54.041	-1.00431
	54.041	-1.00431
	54.041	-1.0043
	54.041	-1.00428
	54.041	-1.00428
	54.041	-1.00423
	54.041	-1.00419
	54.041	-1.00419
	54.041	-1.00415
	54.041	-1.00412
3 Right hand side (unburnt)	54.0402	-1.00532
	54.0402	-1.00528
	54.0404	-1.00485
	54.0404	-1.00484
	54.0404	-1.00492
	54.0404	-1.00493
	54.0404	-1.00481
	54.0404	-1.00481
	54.0405	-1.00485
	54.0404	-1.00473
	54.0404	-1.00471
	54.0404	-1.00471
	54.0405	-1.00476
	54.0405	-1.00476
	54.0405	-1.00478
	54.0405	-1.00479
	54.0405	-1.0048
	54.0405	-1.00479
4	54.0416	-1.00292
	54.0417	-1.00306
	54.0417	-1.00307
	54.0416	-1.00285
	54.0417	-1.00291
	54.0417	-1.00291
	54.0417	-1.00299
	54.0417	-1.003
	54.0417	-1.00302
	54.0417	-1.00304
	54.0417	-1.00305
	54.0417	-1.00306
	54.0417	-1.00304
	54.0417	-1.00303
	54.0418	-1.00274
	54.0419	-1.00272
	54.0418	-1.0025
	54.0418	-1.00249
	54.0421	-1.00233
	54.0421	-1.00222
	54.0421	-1.00216
	54.0423	-1.00213
	54.0423	-1.00214
	54.0423	-1.0022
	54.0423	-1.00219
	54.0424	-1.00218
	54.0424	-1.00216
	54.0424	-1.00213
	54.0424	-1.00211
	54.0423	-1.00204
	54.0423	-1.00202
	54.0423	-1.00202
	54.0427	-1.00193
	54.0427	-1.00135
	54.0427	-1.00134
	54.0427	-1.00134
	54.0427	-1.00128
	54.0427	-1.00129
	54.0427	-1.00129
	54.0427	-1.00129
	54.0427	-1.00128
5	54.0427	-1.00116
	54.0427	-1.00116
	54.0427	-1.00117
	54.0427	-1.00117
	54.0427	-1.00117
	54.0427	-1.00116
	54.0427	-1.00116
	54.0427	-1.00115
	54.0427	-1.00113
	54.0427	-1.00107
	54.0427	-1.00094
	54.0428	-1.00097
	54.0428	-1.00098
	54.0428	-1.00095
	54.0428	-1.00093
	54.0428	-1.00092
	54.0428	-1.00093
	54.0427	-1.00082
	54.0427	-1.00082
	54.0427	-1.00083
	54.0427	-1.00083
	54.0427	-1.00081
	54.0427	-1.00078
	54.0427	-1.00078
	54.0427	-1.00078
	54.0427	-1.00079
	54.0427	-1.00078
	54.0428	-1.00091
	54.0428	-1.00092
	54.0428	-1.00073
	54.0428	-1.00065
	54.0428	-1.00064
	54.0428	-1.00064
	54.0428	-1.00062
	54.0428	-1.00061
	54.0428	-1.00061
	54.0428	-1.00064
	54.0429	-1.00072
	54.0429	-1.00073
	54.0429	-1.00073
	54.0429	-1.00074
	54.0429	-1.00074
	54.0429	-1.00075
	54.0429	-1.00077
	54.0429	-1.00078
	54.0429	-1.00077
	54.0429	-1.00076
	54.0429	-1.00074
	54.0429	-1.00073
	54.0429	-1.00053
	54.0429	-1.00062
	54.043	-1.00067
	54.043	-1.0007
	54.043	-1.00072
	54.043	-1.00072
	54.043	-1.00069
	54.0429	-1.00051
	54.0429	-1.0005
	54.0429	-1.0005
	54.0429	-1.0005
	54.043	-1.00051
	54.0431	-1.00062
	54.0431	-1.0006
	54.043	-1.00043
	54.043	-1.00042
	54.043	-1.00038
	54.043	-1.0004
	54.043	-1.0004
	54.043	-1.00041
	54.043	-1.00044
	54.0431	-1.00053
	54.0431	-1.00052
	54.0431	-1.00049
	54.043	-1.00028
	54.0431	-1.00039
	54.0431	-1.00039
	54.0431	-1.00039
	54.0431	-1.00041
	54.0431	-1.00041
	54.0431	-1.00043
	54.0431	-1.00034
	54.0431	-1.00032
	54.0431	-1.00031
	54.0431	-1.00019
	54.0431	-1.00022
	54.0431	-1.00036
	54.0432	-1.0003
	54.0432	-1.00029
	54.0432	-1.0003
	54.0432	-1.00029
	54.0431	-1.00026
	54.0431	-1.00015
	54.0432	-1.00022
	54.0432	-1.00024
	54.0432	-1.00004
	54.0432	-1.00006
	54.0432	-1.00012
	54.0433	-1.00008
	54.0433	-1.00002
	54.0433	-1.00014
	54.0433	-1.00008
	54.0433	-1.00006
	54.0432	-0.999877
	54.0433	-0.999972
	54.0434	-1.00002
	54.0434	-0.999991
	54.0434	-0.999979
	54.0434	-0.999965
	54.0433	-0.999934
	54.0433	-0.999916
	54.0433	-0.999863
	54.0433	-0.999823
	54.0434	-0.999903
	54.0434	-0.999901
	54.0434	-0.999894
	54.0434	-0.999894
	54.0433	-0.999809
	54.0433	-0.999778
	54.0433	-0.999771
	54.0433	-0.999771
	54.0433	-0.999788
	54.0434	-0.999811
	54.0434	-0.999821
	54.0434	-0.999833
	54.0434	-0.999841
	54.0434	-0.999844
	54.0434	-0.999833
	54.0434	-0.999785
	54.0433	-0.999657
	54.0433	-0.999619
	54.0433	-0.999653
	54.0434	-0.999724
	54.0434	-0.999761
	54.0435	-0.999782
	54.0434	-0.999745
	54.0434	-0.999553
	54.0435	-0.999724
	54.0434	-0.999474
	54.0434	-0.999474
	54.0434	-0.999471
	54.0435	-0.999628
	54.0435	-0.999596
	54.0436	-0.999602
	54.0436	-0.999551
	54.0435	-0.999315
	54.0435	-0.999375
	54.0436	-0.999469
	54.0436	-0.999489
	54.0436	-0.999413
	54.0436	-0.999323
	54.0436	-0.999347
	54.0436	-0.99936
	54.0437	-0.99948
	54.0437	-0.999365
	54.0436	-0.999351
	54.0436	-0.999224
	54.0437	-0.999307
	54.0437	-0.999309
	54.0437	-0.99929
	54.0437	-0.999296
	54.0437	-0.999228
	54.0437	-0.99916
	54.0437	-0.999204
	54.0436	-0.999024
	54.0438	-0.999227
	54.0438	-0.999031
	54.0438	-0.999035
	54.0438	-0.999019
	54.0438	-0.999012
6	54.0439	-0.998775
	54.0441	-0.999053
	54.0441	-0.99905
	54.0441	-0.999017
	54.044	-0.999206
	54.044	-0.999214
	54.044	-0.999216
	54.044	-0.999255
	54.044	-0.999256
	54.044	-0.999265
	54.044	-0.999284
	54.044	-0.999315
	54.0441	-0.999285
	54.0442	-0.999306
	54.0442	-0.999337
	54.0439	-0.999507
	54.0442	-0.999518
	54.0442	-0.999528
	54.0443	-0.999825
	54.0442	-0.99995
	54.0442	-0.999947
	54.0442	-0.999949
	54.0442	-0.999993
	54.0442	-0.999998
	54.0442	-1.00011
	54.0442	-1.00016
	54.0441	-1.00018
	54.044	-1.00055
	54.044	-1.00055
	54.044	-1.00055
	54.044	-1.00055
	54.044	-1.00055
	54.044	-1.00056
	54.044	-1.00056
	54.044	-1.00057
	54.044	-1.00057
	54.044	-1.00061
	54.044	-1.00062
	54.044	-1.00062
	54.044	-1.00065
	54.044	-1.00066
	54.0441	-1.00077
	54.0441	-1.00077
	54.0441	-1.00085
	54.044	-1.00094
	54.044	-1.00094
	54.044	-1.00095
	54.0441	-1.0012
	54.0441	-1.00119
	54.0441	-1.00124
	54.0442	-1.00137
	54.0442	-1.00139
	54.0442	-1.0014
	54.0442	-1.00141
	54.0441	-1.00143
	54.0441	-1.00145
	54.0441	-1.00145
	54.0441	-1.0015
	54.0441	-1.00152
	54.0441	-1.00153
	54.0441	-1.00153
	54.0441	-1.00159
	54.0441	-1.00168
	54.0441	-1.00172
	54.0441	-1.00172
	54.044	-1.00181
	54.044	-1.00179
	54.044	-1.00178
	54.044	-1.00181
	54.044	-1.00185
	54.044	-1.0019
	54.044	-1.0019
	54.044	-1.0019
	54.044	-1.00188
	54.0439	-1.00184
	54.0439	-1.00183
	54.0439	-1.00183
	54.0439	-1.00183
	54.0439	-1.00183
	54.0439	-1.00184
	54.0439	-1.00185
	54.0439	-1.00185
	54.0439	-1.00185
	54.0438	-1.00184
	54.0438	-1.00185
	54.0438	-1.00188
	54.0439	-1.00191
	54.0439	-1.00191
	54.0439	-1.00192
	54.0439	-1.00196
	54.0439	-1.00197
	54.0439	-1.00198
	54.0439	-1.00196
	54.0439	-1.00195
	54.044	-1.00197
	54.044	-1.00198
	54.044	-1.00199
	54.044	-1.00199
	54.044	-1.00199
	54.044	-1.00202
	54.0439	-1.00197
	54.0439	-1.00197
	54.0439	-1.00197
	54.044	-1.00204
	54.044	-1.00206
	54.044	-1.00206
	54.044	-1.00225
	54.044	-1.00225
	54.0441	-1.00243
	54.0441	-1.00242
	54.044	-1.00244
	54.044	-1.00247
7	54.0439	-1.00401
	54.0439	-1.00406
	54.044	-1.00409
	54.0439	-1.0042
	54.0439	-1.00421
	54.0439	-1.00422
	54.0439	-1.00422
	54.0438	-1.00435
	54.0438	-1.00435
	54.0438	-1.00435
	54.0438	-1.00434
	54.0438	-1.00438
	54.0438	-1.0044
	54.0438	-1.00449
	54.0438	-1.00459
	54.0438	-1.00457
	54.0438	-1.0047
	54.0438	-1.0047
	54.0438	-1.0047
	54.0438	-1.0047
	54.0438	-1.0047
	54.0438	-1.00474
	54.0438	-1.00474
	54.0438	-1.00475
	54.0438	-1.00475
	54.0438	-1.00478
	54.0438	-1.00475
	54.0438	-1.00475
	54.0438	-1.00475
	54.0438	-1.00475
	54.0438	-1.00478
	54.0438	-1.00479
	54.0438	-1.00479
	54.0438	-1.00479
	54.0439	-1.00484
	54.0438	-1.00484
	54.0438	-1.00483
	54.0438	-1.00483
	54.0438	-1.00484
	54.0438	-1.00485
8 (RIGHT)
8 (LEFT)	54.0432	-1.00803
	54.0432	-1.00814
	54.0432	-1.00814
	54.0432	-1.00823
	54.0432	-1.00822
	54.0432	-1.00822
	54.043	-1.00894
	54.043	-1.00895
	54.043	-1.00896
	54.043	-1.00906
	54.043	-1.00911
	54.043	-1.00913
	54.043	-1.00916
9	54.0483	-1.00342
	54.0483	-1.00326
	54.0483	-1.00325
	54.0483	-1.00324
	54.0484	-1.00319
	54.0484	-1.00322
	54.0484	-1.00319
	54.0484	-1.00314
	54.0484	-1.00314
	54.0484	-1.00312
	54.0484	-1.00311
	54.0484	-1.00311
	54.0484	-1.00312
	54.0484	-1.00311
	54.0484	-1.00307
	54.0484	-1.00304
	54.0484	-1.00299
	54.0484	-1.00296
	54.0484	-1.00295
	54.0484	-1.00294
	54.0484	-1.0028
	54.0484	-1.00278
	54.0484	-1.00267
	54.0485	-1.00266
	54.0485	-1.00265
	54.0485	-1.00263
	54.0485	-1.00263
	54.0485	-1.00263
	54.0486	-1.00257
	54.0486	-1.00256
	54.0486	-1.00253
	54.0486	-1.0025
	54.0486	-1.0025
	54.0486	-1.0025
	54.0486	-1.00251
	54.0486	-1.00249
	54.0486	-1.00242
	54.0486	-1.00242
	54.0486	-1.00244
	54.0486	-1.00237
	54.0487	-1.00215
	54.0487	-1.00176
10	54.0489	-1.00175
	54.0488	-1.00168
	54.0488	-1.00168
	54.0488	-1.00157
	54.0486	-1.00163
	54.0486	-1.00165
	54.0486	-1.00168
	54.0486	-1.00168
	54.0486	-1.00166
	54.0486	-1.00138
	54.0485	-1.00129
	54.0484	-1.00153
	54.0485	-1.00126
	54.0484	-1.00121
	54.0479	-1.001
11	54.0478	-1.00137
	54.0482	-1.00278
	54.0483	-1.00268
	54.0482	-1.00289
	54.0483	-1.00291
	54.0483	-1.00298
	54.0483	-1.00302
	54.0483	-1.00303
	54.0483	-1.00304
	54.0483	-1.00306
	54.0483	-1.00304

## Sheet: 2013 patch morphology
Salix repens patch morphological measurements along the transect route and in three other "hotspot" locations in 2013
Transect section	Plant	Max Height	Max Width	Stem Heights	Mean Height	Leaf Lengths	Mean Leaf Length	No of Stems	Leaf Hair Abundance	Mean Leaf Density	Scaling up to 10cm	Mean Leaf Density	Latitude	Longitiude
1	1	13	18.5	9	9.42857	2.6	1.63333	10	1	11 / 10cm	11	13.6667	54.0391	-1.00787
				12.5		2
				5.5		1.5				14 / 10cm	14
				8		1.7
				11.5		0.4				8 / 5cm	16
				6.5		1.6
1	2	12	15	9	8.5	1.2	2.2	7	1	9 / 5cm	18	17.3333	54.0391	-1.00795
				5		2.2
				8.5		2.7				11 / 5cm	22
				11.5		3.1
				6.5		1.7				6 / 5cm	12
				7		2.3
1	3	16.5	12	14.5	6	2.3	1.23333	3	1	7 / 5cm	14	16	54.0391	-1.00787
				11		2.7
						2.4				9 / 5cm	18
										8 / 5cm	16
2	1	49	55.5	39.5	35.6429	1.8	1.86667	4	1	5 / 2cm	25	24.6667	54.0399	-1.00602
				36.5		1.4
				42.5		1.6				7 / 5cm	14
				28.5		2.2
				25.5		2.2				7 / 2cm	35
				28		2
2	2	63.5	34.5	61	39.9286	2.2	2.1	3	2	9 / 10cm	9	13	54.0399	-1.00602
				31.5		1.8
				24.5		1.9				8 / 10cm	8
				41		1.9
				26		2.1				11 / 5cm	22
				32		2.7
2	3	37.5	60	24	18.7857	1.6	3.18333	5	2	14 / 10cm	14	25	54.0401	-1.00571
				26.5		2.5
				22.5		1.4				13 / 5cm	26
				7.5		1.2
				6		11				7 / 2cm	35
				7.5		1.4
2	4	66.5	96	40.5	37.2143	1.8	1.3	3	3	12 / 5cm	24	33	54.0401	-1.00571
				47		1.2
				51		1.4				8 / 2cm	40
				20		0.9
				14.5		1.5				7 / 2cm	35
				21		1
2	5	19.5	32	17	10.3571	1.9	1.51667	1	1	8 / 10cm	8	9.66667	54.0401	-1.00568
				10		1.5
				16.5		2				10 / 10cm	10
				9.5		2
						1.7				11 / 10cm	11
2	6	67	138.5	61	45.9286	2	1.93333	10	1	10 / 5cm	20	17.3333	54.0401	-1.00544
				63		2.3
				26.5		1.5				9 / 5cm	18
				21.5		2.5
				28.5		1.5				7 / 5cm	14
				54		1.8
2	7	39.5	72	33	23.3571	1.5	1.4	7	2	11 / 10 cm	11	25.3333	54.0401	-1.00543
				28		1.5
				26.5		1.6				7 / 2cm	35
				10		1.1
				12.5		1.2				6 / 2cm	30
				14		1.5
2	8	64	109	42	38.1429	1.8	2.01667	12	2	12 / 5cm	24	24.6667	54.0401	-1.00542
				55		2
				55.5		1.6				6 / 2cm	30
				13		2.8
				20		2.7				10 / 5cm	20
				17.5		1.2
2	9	22.5	109.5	17.5	18.4286	1.6	1.3	5	1	5 / 2cm	25	20.3333	54.0401	-1.00542
				22		1.3
				20.5		0.9				11 / 5 cm	22
				21		1.5
				11.5		1.5				7 / 5cm	14
				14		1
2	10	43	77.5	28.5	27.7857	1.8	1.85	3	1	5 / 2cm	25	28.3333	54.0402	-1.00544
				33		2.2
				25		2.1				6 / 2cm	30
				18.5		1.4
				20		1.6				6 / 2cm	30
				26.5		2
3	1	44	200	43	17.4286	2.1	1.68333	30	1	5 / 5cm	10	17.3333	54.0403	-1.00541
				6.5		1
				9		2.1				10 / 5cm	20
				11.5		1.1
				4.5		2.5				11 / 5cm	22
				3.5		1.3
3	2	11.5	42.5	12	8.14286	1.9	1.33333	10	2	9 / 5cm	18	33.3333	54.0403	-1.00542
				9		1.9
				11		1				16 / 5cm	32
				3.5		1.1
				4.5		0.8				10 / 2cm	50
				5.5		1.3
3	3	21.1	78.5	14.5	12.5857	2.2	2.11667	4	2	7 / 5cm	14	22	54.0406	-1.00508
				7.5		1.6
				4.5		2.8				8 / 2cm	40
				18		1.1
				13.5		3.1				12 / 10cm	12
				9		1.9
3	4	30	33.5	13	9.35714	2.7	1.46667	3	1	10 / 10cm	10	11.6667	54.0406	-1.00499
				11		2.1
				11.5		2.1				13 / 10cm	13
						1.9
										6 / 5cm	12
3	5	19	46	13.5	13.5714	1.6	1.9	4	1	12 / 10cm	12	11.6667	54.0406	-1.00503
				16.5		2.4
				9		2				7 / 10cm	7
				9.5		1.5
				16.5		2.3				8 / 5cm	16
				11		1.6
3	6	26	94	21	15.9286	2.4	2.06667	10	1	11 / 10cm	11	9	54.0406	-1.00503
				23.5		1.8
				21		1.9				7 / 10cm	7
				6.5		2.4
				9		1.9				9 / 10cm	9
				4.5		2
3	7	13.5	43	9	8.21429	1.7	1.75	3	1	10 / 5cm	20	16.6667	54.0406	-1.00506
				5.5		1.3
				10.5		1.7				7 / 5cm	14
				9.5		2.2
				4		1.8				8 / 5cm	16
				5.5		1.8
3	8	33.5	200	20	15.9286	1.4	2.15	40	2	10 / 10cm	10	11.3333	54.0406	-1.00499
				23.5		1.7
				21		1.8				13 / 10cm	13
				5		2.4
				5.5		3.1				11/ 10cm	11
				3		2.5
3	9	21.5	147	18.5	13.2143	1.5	1.65	25	2	15 / 10cm	15	18.6667	54.0406	-1.00499
				20.5		1.3
				16		0.9				13 / 10cm	13
				5.5		1.9
				7		2.1				14 / 5cm	28
				3.5		2.2
3	10	14.5	92	9.5	7.92857	1.8	1.55	10	2	13 / 5cm	26	22.6667	54.0406	-1.00499
				5		1.9
				7.5		1.9				10 / 5cm	20
				9		0.9
				4		1.2				11 / 5cm	22
				6		1.6
3	11	23.5	60.5	15.5	12.5	2.2	1.9	2	1	7 / 5cm	14	20	54.0402	-1.00532
				13		2.4
				7		2.4				4 / 2cm	20
				10		1.1
				8.5		1.5				13 / 5cm	26
				10		1.8
3	12	51	34	45	40.7143	1.6	1.1	1	1	9 / 5cm	18	22.6667	54.0404	-1.00485
				42.5		1
				49		0.6				4 / 2cm	20
				27		1.1
				32.5		1.3				6 / 2cm	30
				38		1
3	13	25.5	89	17	18.1429	2	1.61667	5	2	10 / 2cm	50	30.6667	54.0404	-1.00492
				15.5		1.6
				25		1.7				12 / 5cm	24
				24.5		1.6
				12.5		1.6				9 / 5cm	18
				7		1.2
3	14	25	94	24	17	2.7	2.98333	20	1	12 / 10cm	12	12.3333	54.0404	-1.00481
				19		3.4
				15		3.1				14 / 10cm	14
				14.5		3.2
				12.5		2.4				11 / 10cm	11
				9		3.1
3	15	30	106	29	21.2143	1.9	1.96667	10	2	9 / 5cm	18	22.6667	54.0405	-1.00485
				28.5		2.7
				25		1.6				5 / 2cm	25
				13.5		2.1
				14.5		1.4				5 / 2cm	25
				8		2.1
3	16	44.5	61.5	42	26.9286	1.6	1.43333	4	1	6 / 2cm	30	28.3333	54.0404	-1.00471
				40		1.5
				37.5		1.2				7 / 2cm	35
				11		1.1
				4		1.8				4 / 2cm	20
				9.5		1.4
3	17	20.5	83	20	14	1.2	1.33333	10	1	4 / 2cm	20	28.3333	54.0405	-1.00476
				13		1.5
				17.5		1.4				7 / 2cm	35
				6.5		1.4
				16		1.3				6 / 2cm	30
				4.5		1.2
3	18	28.5	110	11	15.3571	1.4	1.4	5	1	6 / 2cm	30	23.6667	54.0405	-1.00478
				9		1.1
				9.5		1.3				5 / 2cm	25
				8		1.5
				21		1.4				8 / 5cm	16
				20.5		1.7
3	19	45	78.5	23	33.7857	1.3	1.4	6	1	7 / 2cm	35	33.3333	54.0405	-1.0048
				29		1.3
				28.5		1.4				6 / 2cm	30
				42		1.6
				41.5		1.4				7 / 2cm	35
				27.5		1.4
3	20	38	66	19	24.5714	2.3	1.56667	3	1	6 / 2cm	30	21.3333	54.0405	-1.00479
				16		1.4
				18.5		1.2				8 / 5cm	16
				33.5		1.9
				34.5		1.4				9 / 5cm	18
				12.5		1.2
4	1	22.5	67	15	14.3571	1.6	1.33333	4	1	10 / 5cm	20	22.3333	54.0416	-1.00292
				18		1.4
				20		1.3				11 / 5cm	22
				7.5		1
				8		1				5 / 2cm	25
				9.5		1.7
4	2	36	88.5	20.5	18.6429	2.1	1.91667	10	1	9 / 5cm	18	12.3333	54.0416	-1.00285
				25		2.6
				26.5		2.5				6 / 5cm	12
				10.5		1.1
				8.5		1.7				7 / 10cm	7
				3.5		1.5
4	3	11.5	77	9	6.71429	1.9	1.96667	12	1	6 / 5cm	12	15	54.0417	-1.00291
				9.5		3.2
				8.5		2.2				7 / 5cm	14
				4.5		1.8
				1.5		1.5				9 / 5cm	19
				2.5		1.2
4	4	24.5	48	17.5	16.5	1.6	1.63333	10	2	5 / 2cm	25	28.6667	54.0417	-1.00299
				18		1.6
				22		1.4				13 / 5cm	26
				11		1.9
				9.5		1.7				7 / 2cm	35
				13		1.6
4	5	29	121.5	27	19.0714	3	2.18333	25	2	14 / 10cm	14	11	54.0417	-1.00302
				21		2.6
				27.5		2.8				9 / 10cm	9
				7.5		1.7
				12		1.6				10 / 10cm	10
				9.5		1.4
4	6	42	130	33.5	27.2857	2	1.56667	15	1	8 / 2cm	40	34	54.0417	-1.00304
				29.5		1.4
				38.5		1.8				8 / 2cm	40
				18		1.6
				17.5		1.4				11 / 5cm	22
				12		1.2
4	7	42	85	33	26.1429	1.8	1.76667	20	3	20 / 10cm	20	21	54.0417	-1.00305
				22.5		2.4
				29		2.2				21 / 10cm	21
				40		1.4
				5.5		1.5				11 / 5cm	22
				11		1.3
4	8	40	81	30	27.5	1.2	1.4	10	3	6 / 2cm	30	36.6667	54.0417	-1.00304
				28		0.8
				24		2.1				7 / 2cm	35
				27.5		1.6
				23.5		1.4				9 / 2cm	45
				19.5		1.3
4	9	13	80	10	9.07143	1.4	1.86667	15	1	6 / 2cm	30	26.6667	54.0418	-1.00274
				9.5		2.3
				6		1.6				10 / 5cm	20
				11		2.5
				8		1.7				6 / 2cm	30
				6		1.7
4	10	61.5	46	27.5	33.0714	2	1.58333	3	3	17 / 10cm	17	18.3333	54.0418	-1.00249
				34		2.1
				44		1.8				18 / 10cm	18
				23.5		1.9
				18		0.7				10 / 5cm	20
				23		1
4	11	42	183	32	23.6429	2.3	2.2	80	1	10 / 10cm	10	11	54.0421	-1.00216
				38		2.2
				37		2				11 / 10cm	11
				4		2.3
				6		1.9				12 / 10cm	12
				6.5		2.5
4	12	19	67	7	10.1429	2.8	2.03333	10	1	9 / 5cm	18	18.6667	54.0423	-1.00213
				8		1.9
				6		1.5				9 / 5cm	18
				9		1.4
				12		2				10 / 5cm	20
				10		2.6
4	13	19.5	83	19	14.2857	1.9	2.06667	5	1	13 / 10cm	13	11.6667	54.0424	-1.00218
				17		2.1
				18		1.8				11 / 10cm	11
				10		2
				8.5		2.4				11 / 10cm	11
				8		2.2
4	14	20	55.5	17	10.2143	1.7	1.88333	8	1	6 / 2cm	30	22.6667	54.0424	-1.00211
				10		1.3
				10		1.6				4 / 2cm	20
				4		1.2
				4.5		1.9				9 / 5cm	18
				6		3.6
4	15	14.5	37	13.5	11.7143	1.4	1.65	5	1	5 / 2cm	25	35	54.0423	-1.00202
				11		1.9
				9		1.7				7 / 5cm	35
				8.5		2.1
				13.5		1.7				9 / 5cm	45
				12		1.1
4	16	16.5	105	13	12.0714	1.9	1.8	15	3	6 / 2cm	30	31.6667	54.0427	-1.00193
				12		1
				8.5		1.7				8 / 2cm	40
				14		2.5
				10		1.9				5 / 2cm	25
				10.5		1.8
4	17	34	143	31	24.5	3.5	1.98333	25	1	7 / 5cm	14	14	54.0427	-1.00135
				32		1.4
				29		1.6				13 / 10cm	13
				16		1.6
				15		2				15 / 10cm	15
				14.5		1.8
4	18	38	50	32	30.5	1.4	1.56667	15	1	6 / 2cm	30	31.6667	54.0427	-1.00134
				37.5		1.5
				37		1.7				9 / 2cm	45
				25		1.8
				20		1.6				10 / 5cm	20
				24		1.4
4	19	24	72	20	18.4286	1.6	1.63333	15	2	6 / 2cm	30	30	54.0427	-1.00128
				8.5		1.9
				21		1.7				4 / 2cm	25
				22		1.5
				11.5		1.5				7 / 2cm	35
				22		1.6
4	20	24	37	20	16.5714	1.5	1.51667	5	2	5 / 2cm	25	19	54.0427	-1.00128
				10		1.7
				12.5		1.4				12 / 10cm	12
				16		1.3
				19.5		1.3				10 / 5cm	20
				14		1.9
5	1	14	38	9.5	10.0714	1.3	1.2	10	2	9 / 5cm	18	24.3333	54.0427	-1.00117
				14		1.7
				8.5		0.9				5 / 2cm	25
				7		1.2
				8.5		1.1				6 / 2cm	30
				9		1
5	2	16.5	46	7.5	7.72857	1.5	1.38333	5	1	7 / 5cm	14	14.6667	54.0427	-1.00113
				9		1.8
				11		1.1				6 / 5cm	12
				2		1.4
				4.5		1.2				9 / 5cm	18
				3.6		1.3
5	3	40	58.5	30	29.7143	1.3	1.38333	9	1	5 / 2cm	25	24.3333	54.0427	1.00082
				38		1.2
				37.5		1.8				6 / 2cm	30
				25		1.2
				21		1.6				9 / 5cm	18
				16.5		1.2
5	4	23	51	28	16.4286	1.8	2	12	1	10 / 5cm	20	19	54.0428	-1.00065
				20		2.5
				13		0.9				12 / 5cm	24
				8		2.1
				9		3				13 / 10cm	13
				14		1.7
5	5	22	50	15	15.5	1.6	1.51667	5	2	6 / 2cm	30	35	54.0428	-1.00064
				10		1.5
				19.5		1.6				8 / 2cm	40
				20		1.4
				12		1.4				7 / 2cm	35
				10		1.6
5	6	22	57	17	15.0714	2.3	1.73333	14	1	8 / 2cm	40	22	54.0429	-1.00074
				14.5		2.2
				18.5		1.7				12 / 10cm	12
				18.5		1.7
				10		1.1				7 / 5cm	14
				5		1.4
5	7	31	21	26	28.8571	1.9	2.26667	2	3	9 / 5cm	18	17.3333	54.0429	-1.00074
				30.5		2.4
				28.5		2.1				7 / 5cm	14
				30		2.2
				27		2.2				4 / 2cm	20
				29		2.8
5	8	56	39	49	48.5714	2.3	2.33333	2	1	6 / 2cm	30	22.6667	54.043	-1.00072
				45		1.9
				50		2.5				11 / 5cm	22
				53		2.4
				47		2.6				8 / 5cm	16
				40		2.3
5	9	18.5	68	14	11.6429	1.8	1.5	12	1	5 / 2cm	25	23	54.043	-1.00038
				9.5		1.5
				7.5		1.6				7 / 5cm	14
				6		1.9
				12		1.4				6 / 2cm	30
				14		0.8
5	10	25	53	20	15.0714	1.6	1.88333	8	1	7 / 5cm	14	14.6667	54.0431	-1.00039
				16		2.4
				19		1.3				12 / 10cm	12
				10		1.8
				7		2.2				9 / 5cm	18
				8.5		2
5	11	36.5	73	29	22	1.4	1.26667	19	2	6 / 2cm	30	33.3333	54.0432	-1.0003
				25		1.1
				24		1.2				7 / 2cm	35
				15		1.1
				11		1.5				7 / 2cm	35
				13.5		1.3
5	12	12	20	8.5	7	3	2.33333	5	1	10 / 5cm	20	16	54.0433	-1.00008
				7		2.4
				7.5		2				12 / 10cm	12
				4.5		1.9
				5		2.3				8 / 5cm	16
				4.5		2.4
5	13	23	57	5	12	2.2	2.03333	17	1	7 / 5cm	14	18.3333	54.0432	-0.999877
				11		2.1
				12		1.5				5 / 2cm	25
				9.5		2.3
				4		2.5				8 / 5cm	16
				19.5		1.6
5	14	33	44	23	16.7143	1.4	1.53333	4	1	20 / 10cm	20	19	54.0433	-0.999809
				12		1.6
				10		1.4				22 / 10cm	22
				12.5		1.4
				19.5		1.7				15 / 10cm	15
				7		1.7
5	15	23	123	16.5	14.7857	1.3	1.75	32	2	6 / 2cm	30	38.3333	54.0433	-0.999619
				13		2.1
				14.5		1.7				8 / 2cm	40
				17		1.3
				11		1.6				9 / 2cm	45
				8.5		2.5
5	16	15	78	8	9.57143	1.5	1.8	17	1	7 / 2cm	35	20.3333	54.0434	-0.999724
				10		3.1
				11.5		2.2				8 / 5cm	16
				12.5		1.1
				5		1.2				5 / 5cm	10
				5		1.7
5	17	38	76	22	24.7143	1.7	1.46667	7	2	7 / 2cm	35	35	54.0435	-0.999315
				28		1.2
				35		1.1				8 / 2cm	40
				14		1.4
				19		1.8				6 / 2cm	30
				17		1.6
5	18	24.5	65	19	18.4286	1.6	1.8	8	2	8 / 5cm	16	16.6667	54.0436	-0.999323
				20		2.2
				22		1.8				9 / 5cm	18
				13		1.3
				22.5		1.7				8 / 5cm	16
				8		2.2
5	19	19	33	12	12.2857	1.7	1.36667	2	1	5 / 2cm	25	20	54.0436	-0.999224
				11		1.3
				15		1.1				4 / 2cm	20
				17.5		1.6
				6.5		1.2				3 / 2cm	15
				5		1.3
5	20	37.5	110	16	20.7857	1.3	1.7	16	1	14 / 10cm	14	21.3333	54.0438	-0.999019
				27		2.1
				22		1.6				12 / 5cm	24
				32		1.5
				6		2.1				13 / 5cm	26
				5		1.6
6	1	22	27	11.5	11	2.6	2.15	5	1	7 / 10cm	7	6.66667	54.044	-1.00225
				10		2.2
				13		1.9				6 / 10cm	6
				9.5		2
				6.5		2.2				7 / 10cm	7
				4.5		2
6	2	10	46	8.5	6	1.2	1.55	10	2	8 / 5cm	16	17.6667	54.044	-1.00204
				6		2
				7.5		1.5				5 / 2cm	25
				4		0.9
				2.5		1.9				6 / 5cm	12
				3.5		1.8
6	3	8	27	5.5	5.07143	0.9	1.35	7	1	4 / 2cm	20	25	54.0439	-1.00197
				4.5		1.8
				7		1.8				6 / 2cm	30
				3		1.1
				4		1				5 / 2cm	25
				3.5		1.5
6	4	13	46	8	7.78571	1.5	1.45	12	1	7 / 5cm	14	13	54.0439	-1.00196
				6		1.3
				7.5		1.3				5 / 5cm	10
				4		1.7
				6.5		1.5				3 / 2cm	15
				9.5		1.4
6	5	27	35	21	16.9286	0.8	1.11667	6	1	4 / 2cm	20	19	54.0439	-1.00183
				23		0.6
				13.5		1.1				6 / 2cm	30
				15		1.5
				7		1.7				7 / 10cm	7
				12		1
6	6	22	65	14	13.3571	1.4	1.56667	8	1	11 / 10cm	11	11.6667	54.0441	-1.00172
				16.5		2.3
				19		1.3				7 / 5cm	14
				9		1.6
				5		1.6				5 / 5cm	10
				8		1.2
6	7	25	63	17	18.7857	1.9	1.46667	7	2	6 / 2cm	30	24.6667	54.0442	-1.00139
				19		1.6
				23.5		1.2				7 / 5cm	14
				15.5		1.3
				17		1.5				6 / 2cm	30
				14.5		1.3
6	8	20	21	17	10.7143	1.3	0.783333	6	1	4 / 2cm	20	33.3333	54.044	-1.00062
				10		1
				9.5		0.7				8 / 2cm	40
				8.5		0.4
				10		0.4				8 / 2cm	40
						0.9
6	9	30	62	24	19.0714	2.5	1.65	18	1	9 / 2cm	45	24.3333	54.0441	-1.00018
				15		1.2
				22.5		1.8				6 / 5cm	12
				10		1.6
				13.5		1.3				8 / 5cm	16
				18.5		1.5
6	10	18	51	17	11.2143	1.1	1.41667	8	1	7 / 2cm	35	28.3333	54.0442	-0.999993
				17.5		1.6
				7		1.4				6 / 2cm	30
				6		1.6
				4.5		1.7				10 / 5cm	20
				8.5		1.1
6	11	15	88	12	9.64286	1.7	1.36667	27	2	9 / 2cm	45	34.6667	54.0439	-0.999507
				7.5		1.4
				11.5		1.2				7 / 2cm	35
				4.5		1.8
				10		1.2				12 / 5cm	24
				7		0.9
6	12	17	47	14	11.2143	1.5	1.48333	14	1	5 / 2cm	25	31.6667	54.044	-1.00057
				13.5		1.3
				16.5		2				7 / 2cm	35
				7		1.2
				4.5		1.4				7 / 2cm	35
				6		1.5
6	13	24	38	8.5	16.2143	1.8	1.65	5	2	7 / 5cm	14	21.3333	54.044	-1.00095
				22		1.5
				9.5		1.5				10 / 5cm	20
				13		2.1
				15		1.8				6 / 2cm	30
				21.5		1.2
6	14	10	34	5	6.71429	0.8	1.13333	4	1	11 / 2cm	55	45	54.0441	-1.00145
				8.5		0.9
				4		1.1				9 / 2cm	45
				6		1.3
				6.5		1.2				7 / 2cm	35
				7		1.5
6	15	19.5	57	18	12.9286	1.3	1.36667	16	2	7 / 2cm	35	27	54.044	-1.00178
				8.5		1.1
				13		1.5				12 / 5cm	24
				9.5		1.3
				7		1.6				11 / 5cm	22
				15		1.4
6	16	24	37	9.5	13.6429	1.6	1.7	5	1	7 / 2cm	35	22.3333	54.044	-1.00185
				18.5		2
				20		1.2				8 / 5cm	16
				10		2.3
				6.5		1.6				8 / 5cm	16
				7		1.5
6	17	34	63	23	18.8571	1.7	1.53333	10	1	7 / 2cm	35	35	54.0438	-1.00185
				26		1.2
				22		2.2				5 / 2cm	25
				11.5		1.3
				7		1.5				9 / 2cm	45
				8.5		1.3
6	18	28	20	14.5	16	1.2	1.48333	3	1	7 / 5cm	14	14	54.0439	-1.00191
				16		1.7
				15		1.5				10 / 5cm	20
				15		1.6
				11		1.6				8 / 10cm	8
				12.5		1.3
6	19	23	25	19	15.0714	1.6	1.6	4	1	5 / 2cm	25	17.3333	54.0439	-1.00196
				17.5		2.3
				19.5		1.3				13 / 10cm	13
				12		1.5
				7		1.6				7 / 5cm	14
				7.5		1.3
6	20	19	58	16	12.4286	3.6	3.05	10	1	9 / 10cm	9	9.33333	54.044	-1.00199
				14.5		2.9
				9.5		2.5				8 / 10cm	8
				10		3.4
				7		2.7				11 / 10cm	11
				11		3.2
7	1	19	50	18	12.9286	0.6	1.11667	11	1	6 / 2cm	30	36.6667	54.0439	-1.00401
				11.5		1.5
				10		1.7				7 / 2cm	35
				6.5		0.7
				8.5		1.1				9 / 2cm	45
				17		1.1
7	2	12	32	9	8.07143	1.3	1.23333	5	1	6 / 2cm	30	31.6667	54.0439	-1.00422
				10.5		1.1
				8.5		1.6				6 / 2cm	30
				4		1.2
				5.5		1.1				7 / 2cm	35
				7		1.1
7	3	20	7	14	16.7	0.6	0.56	1	1	6 / 2cm	30	38.3333	54.0439	-1.00422
				17		0.5
				15		0.6				10 / 2cm	50
				17.5		0.4
						0.7				7 / 2cm	35
7	4	21.5	48	17	13	1.5	1.66667	11	1	8 / 5cm	16	23.6667	54.0438	-1.00435
				8		1.7
				14		1.6				6 / 2cm	30
				12.5		1.9
				9.5		1.7				5 / 2cm	25
				8.5		1.6
7	5	23	55	21	14.9286	2	1.33333	4	2	8 / 5cm	16	15.6667	54.0438	-1.00435
				15		1.4
				15		1.1				15 / 10cm	15
				13.5		1.2
				7.5		1.2				8 / 5cm	16
				9.5		1.1
7	6	12.5	37	9	5.5	1.1	1.16667	5	1	4 / 2cm	20	21.6667	54.0438	-1.00449
				11		1.4
				5		2.3				6 / 2cm	30
				1		1.4
						0.8				3 / 2cm	15
7	7	33	53	26	15.9286	0.9	1.41667	3	1	9 / 5cm	45	27	54.0438	-1.00459
				17.5		1.3
				10		2				10 / 5cm	20
				11.5		1.6
				7.5		1.4				8 / 5cm	16
				6		1.3
7	8	19.5	42	12	14.7143	2.1	1.56667	5	1	6 / 2cm	30	27.3333	54.0438	-1.00457
				15		1.7
				13		2				6 / 5cm	12
				14.5		1.2
				16.5		1.1				8 / 2cm	40
				12.5		1.3
7	9	21	40	20	14.5	1.6	1.55	10	1	8 / 5cm	16	18	54.0438	-1.0047
				20.5		0.8
				6		1.5				10 / 5cm	20
				7.5		0.9
				8		2.8				9 / 5cm	18
				18.5		1.7
7	10	13	33	11	9.28571	1.3	1.36667	10	1	11 / 5cm	22	20.3333	54.0438	-1.0047
				6.5		0.7
				5.5		1.4				7 / 5cm	14
				10		1.3
				9		1.4				5 / 2cm	25
				10		2.1
7	11	18	24	16	11.7143	1.7	1.43333	3	2	12 / 5cm	24	26.3333	54.0438	-1.0047
				12		1.5
				14		1.2				4 / 2cm	20
				5		1.3
				5.5		1.8				7 / 2cm	35
				11.5		1.1
7	12	13	50	10	9.35714	1.6	1.28333	14	1	6 / 2cm	30	28.3333	54.0438	-1.00474
				12		1.4
				12		1.2				4 / 2cm	20
				6.5		1.3
				5		1				7 / 2cm	35
				7		1.2
7	13	21	39	16.2	15.4571	1.2	1.48333	16	2	12 / 5cm	24	22	54.0438	-1.00474
				17.5		1.2
				15		1.5				11 / 5cm	22
				19		2
				10		1.4				10 / 5cm	20
				9.5		1.6
7	14	18	35	14	11	1.6	1.38333	7	1	10 / 2 cm	50	26.6667	54.0438	-1.00478
				13		1.8
				14.5		0.8				6 / 5cm	12
				6.5		1.3
				4		1.4				9 / 5cm	18
				7		1.4
7	15	17	30	10	10.3571	1.3	1.41667	5	1	6 / 2cm	30	33.3333	54.0438	-1.00475
				14.5		1.3
				5.5		1.2				7 / 2cm	35
				6		1.8
				7.5		1.2				7 / 2cm	35
				12		1.7
7	16	25	115	15.5	13.9286	2.1	1.76667	30	1	12 / 5cm	24	17.6667	54.0438	-1.00475
				20		1.7
				16		1.3				5 / 10cm	5
				9.5		1.1
				6		2.8				12 / 5cm	24
				5.5		1.6
7	17	30	26	25	20.8571	2	1.38333	3	2	6 / 2cm	30	28.3333	54.0438	-1.00478
				22		1.1
				24.5		1.6				7 / 2cm	35
				20.5		0.9
				24		1.2				4 / 2cm	20
						1.5
7	18	38	33	22.5	20.6429	1.2	1.4	6	2	4 / 2cm	20	28	54.0438	-1.00479
				28.5		1.4
				20		1.4				6 / 2cm	30
				24.5		1.5
				4		1.7				17 / 5cm	34
				7		1.2
7	19	14	34	7.5	8.78571	1.7	1.16667	7	2	6 / 2cm	30	28.3333	54.0438	-1.00484
				12		0.9
				10		1				7 / 5cm	35
				7.5		1.4
				4		0.9				4 / 2cm	20
				6.5		1.1
7	20	20	46	16.5	14.2143	1.1	1.16667	10	3	6 / 2cm	30	30	54.0438	-1.00483
				14		1.2
				17.5		0.9				7 / 2cm	35
				13		0.7
				5.5		1.3				5 / 2cm	25
				13		1.8
8	1	20	25.5	14.5	13.2143	2.8	2.33333	3	1	6 / 5cm	12	14.6667	54.0432	-1.00803
				10.5		3.1
				6.5		2.3				8 / 5cm	16
				17.5		2.2
				9.5		1.5				8 / 5cm	16
				14		2.1
8	2	46.5	30	32.5	33.3571	1.5	1.51667	1	2	7 / 2cm	35	36.6667	54.0432	-1.00814
				36		1.7
				23.5		1.7				6 / 2cm	30
				37.5		1.6
				30		1.5				9 / 2cm	45
				27.5		1.1
8	3	37	23.5	21	21.0714	0.9	1.06667	3	1	12 / 5cm	24	22.6667	54.0432	-1.00814
				14		0.8
				17.5		1.5				6 / 2cm	30
				18		1.5
				21.5		0.6				7 / 5cm	14
				18.5		1.1
8	4	30.5	11.5	14.5	15.6429	1.6	1.73333	3	1	7 / 5cm	14	18.3333	54.0432	-1.00822
				15		2.3
				17		1.5				8 / 5cm	16
				11.5		1.9
				11		1.6				5 / 2cm	25
				10		1.5
8	5	21.5	8	17	13.6429	2	1.6	3	1	7 / 5cm	14	16.6667	54.0432	-1.00822
				17.5		1.6
				8.5		0.8				8 / 5cm	16
				7.5		1.2
				10.5		2.1				4 / 2cm	20
				13		1.9
8	6	28	30.5	18.5	19.1429	2.2	1.5	5	1	12 / 5cm	24	29.6667	54.043	-1.00894
				12.5		1.7
				17.5		2.1				7 / 2cm	35
				20		1
				21		1.1				6 / 2cm	30
				16.5		0.9
8	7	21	26.5	8.5	14.2143	2.1	1.68333	3	1	6 / 5cm	12	14.6667	54.043	-1.00896
				12.5		1.8
				17		1.7				6 / 5cm	12
				17.5		2
				13.5		1.3				10 / 5cm	20
				9.5		1.2
8	8	6.5	4.5	6.5	2.57143	1.5	0.6	1	1	3 / 2cm	15	21.6667	54.043	-1.00906
				5		1.5
						0.6				5 / 2cm	25
										5 / 2cm	25
8	9	29.5	164	13.5	19.4286	1.5	2.1	15	2	6 / 2cm	30	26.6667	54.043	-1.00911
				20.5		3.4
				16.5		1.5				6 / 2cm	30
				16		1.1
				18		2.4				10 / 5cm	20
				22		2.7
8	10	15.5	44	8.5	6	2	1.63333	5	1	4 / 2cm	20	24	54.043	-1.00916
				5		1.8
				6.5		1.4				6 / 2cm	30
				2.5		2.2
				2		1.2				11 / 5cm	22
				2		1.2
9	1	18	64	17	12.1429	1.3	1.33333	16	1	9 / 2cm	45	34	54.0483	-1.00342
				12.5		1.2
				9		1.1				7 / 2cm	35
				7.5		1.7
				15		1.3				11 / 5cm	22
				6		1.4
9	2	5.5	24	4.5	3.21429	1.1	1.23333	4	1	6 / 2cm	30	30	54.0483	-1.00324
				1.5		0.7
				4.5		1.4				7 / 2cm	35
				2		1.1
				1.5		1.6				5 / 2cm	25
				3		1.5
9	3	16	28	14	13.0714	1.7	1.71667	5	1	7 / 5cm	35	20.3333	54.0484	-1.00314
				13		1.6
				10.5		1.9				5 / 5cm	10
				15.5		1.7
				12		1.4				8 / 5cm	16
				10.5		2
9	4	10	18	4.5	4.85714	1.7	1.5	2	1	8 / 5 cm	16	11.3333	54.0484	-1.00311
				3.5		1.3
				5		1.9				5 / 5cm	10
				6.5		1.5
				1		1.5				4 / 5cm	8
				3.5		1.1
9	5	22.5	11	15	14.7857	1.4	1.18333	3	1	4 / 2cm	20	20	54.0484	-1.00312
				19.5		1.2
				18.5		1.1				3 / 2cm	15
				14		1
				14		1.6				5 / 2cm	25
						0.8
9	6	22	19	14.5	16.0714	1.8	1.35	2	1	7 / 5cm	14	10.6667	54.0484	-1.00304
				17		1.4
				19		0.8				5 / 5cm	10
				13.5		1.2
				15		1.9				4 / 5cm	8
				11.5		1
9	7	25	8	16.5	5.92857	3.1	0.916667	1	1	16 / 10cm	16	18	54.0484	-1.00299
						2.4
										4 / 2cm	20
9	8	25	47	19	16.2143	1.5	1.61667	5	1	6 / 2cm	30	23.6667	54.0484	-1.00296
				11		1.4
				16.5		0.8				8 / 5cm	16
				9.5		1.7
				12.5		2.8				5 / 2cm	25
				20		1.5
9	9	18	16	15	15.6429	1.7	1.8	3	2	8 / 5cm	16	19.3333	54.0484	-1.00295
				16.5		1.5
				16.5		1.8				10 / 5cm	20
				17		2.2
				12		1.6				11 / 5cm	22
				14.5		2
9	10	17	55	13	13.4286	1.6	1.9	6	1	7 / 5cm	14	16.6667	54.0484	-1.00278
				14.5		1.3
				12		1.9				8 / 5cm	16
				16		1.8
				10.5		2.7				10 / 5cm	20
				11		2.1
9	11	18	30	15	12.7857	2	1.88333	2	2	7 / 5cm	14	10.6667	54.0484	-1.00267
				7.5		1.6
				10.5		1.8				5 / 5cm	10
				10		1.5
				11.5		2.8				4 / 5cm	8
				17		1.6
9	12	14	30	8	8.42857	2	1.71667	7	1	6 / 5cm	12	14.6667	54.0485	-1.00265
				9.5		1.7
				10		1.3				9 / 5cm	18
				2		1.7
				7.5		1.9				7 / 5cm	14
				8		1.7
9	13	15.5	20	15	9.5	0.8	1.31667	4	1	10 / 2cm	50	41.6667	54.0485	-1.00263
				7		1.5
				6.5		1.9				8 / 2cm	40
				6.5		1.1
				8		1.4				7 / 2cm	35
				8		1.2
9	14	30	64	15	18.5	2.1	1.78333	8	1	7 / 5cm	14	17.6667	54.0486	-1.00256
				16.5		1.7
				19		1.9				7 / 5cm	14
				20		1.5
				15.5		1.1				5 / 2cm	25
				13.5		2.4
9	15	17	16	5.5	9.21429	1.7	1.66667	1	1	5 / 2cm	25	24.3333	54.0486	-1.00253
				9		1.9
				6		2				9 / 5cm	18
				7		1.5
				10.5		1.1				6 / 2cm	30
				9.5		1.8
9	16	15.5	33	13	10.5714	2.1	1.75	5	1	11 / 5cm	22	25.6667	54.0486	-1.0025
				10.5		1.7
				12		1.5				7 / 2cm	35
				7.5		1.8
				8.5		2.1				10 / 5cm	20
				7		1.3
9	17	17	16	12.5	13.2143	2.2	1.71667	2	1	9 / 5cm	18	14.6667	54.0486	-1.00242
				10		1.7
				11		1.8				5 / 5cm	10
				12		1.5
				16.5		1.6				8 / 5cm	16
				13.5		1.5
9	18	11.5	25	10.5	8.71429	1.5	1.55	7	1	5 / 2cm	25	33.3333	54.0486	-1.00237
				10		2.2
				8		1.3				7 / 2cm	35
				4.5		1.4
				7		1.5				8 / 2cm	40
				9.5		1.4
9	19	16	35	14.5	14.2143	1.7	1.71667	6	1	9 / 5cm	18	16	54.0487	-1.00215
				13		1.6
				15		1.8				8 / 5cm	16
				12.5		1.7
				13.5		1.7				7 / 5cm	14
				15		1.8
9	20	45	39	39.5	19.5714	1.6	0.983333	2	1	5 / 2cm	25	30	54.0487	-1.00176
				28.5		1.4
				24		1.4				7 / 2cm	35
						1.5
										6 / 2cm	30
10	1	20	40	15	14.4286	2.5	1.85	3	1	5 / 2cm	25	17.3333	54.0489	-1.00175
				18.5		1.5
				16		2.1				3 / 2cm	15
				12		1.8
				19.5		1.5				6 / 5cm	12
						1.7
10	2	50	96	30	31	1.2	1.83333	8	1	7 / 5cm	14	13.6667	54.0488	-1.00168
				34.5		1.4
				30		1.1				7 / 10cm	7
				36		1.7
				19.5		3.2				4 / 2cm	20
				17		2.4
10	3	15.5	33	10	10.2857	1.7	1.41667	5	1	5 / 2cm	25	31.6667	54.0486	-1.00165
				11		1.7
				9.5		1.3				6 / 2cm	30
				13.5		1.2
				12.5		1.1				8 / 2cm	40
						1.5
10	4	18	12	14	6.92857	1.2	0.616667	1	1	5 / 2cm	25	21.6667	54.0486	-1.00168
				16.5		1.1
						1.4				3 / 2cm	15
										5 / 2cm	25
10	5	12.5	23	8.5	9.42857	1.1	1.23333	4	1	6 / 2cm	30	31.6667	54.0485	-1.00129
				9		1
				10		1.5				5 / 2cm	25
				10		1.4
				9.5		1.5				8 / 2cm	40
				6.5		0.9
10	6	23	28	10	14.7857	1.7	1.58333	7	1	5 / 5cm	10	10	54.0485	-1.00126
				19		1.6
				16.5		1.6				4 / 5cm	8
				13.5		1.9
				6.5		1.4				6 / 5cm	12
				15		1.3
11	1	30	17	17	20.5	1.4	1.4	2	1	4 / 2cm	20	26.6667	54.0478	-1.00137
				20.5		1.5
				22.5		1.6				6 / 2cm	30
				26		1.5
				27.5		1.2				6 / 2cm	30
						1.2
11	2	25.5	30	22	16.5	1.3	1.06667	3	1	4 / 2cm	20	20	54.0482	-1.00278
				18.5		1.2
				15		0.9				5 / 2cm	25
				18		1.1
				16.5		1				3 / 2cm	15
						0.9
11	3	35	37	19.5	12.6429	0.9	0.966667	2	1	5 / 2cm	25	21.6667	54.0483	-1.00268
				9.5		0.9
				10		1				3 / 2cm	15
				7		1.1
				7.5		0.9				5 / 2cm	25
						1
11	4	8.5	34	6	5.42857	2.1	1.85	4	1	6 / 5cm	12	15.6667	54.0482	-1.00289
				5.5		2.9
				2.5		2				5 / 5cm	10
				5		1.3
				4		1.4				5 / 2cm	25
				6.5		1.4
11	5	30	56	19	20.6429	1.5	1.61667	11	1	6 / 5cm	12	16.6667	54.0483	-1.00291
				21.5		1.6
				9.5		1.6				8 / 5cm	16
				14		2.1
				26		1.2				11 / 5cm	22
				24.5		1.7
11	6	31	46	25.5	24.2143	1.5	1.63333	2	2	5 / 2cm	25	30	54.0483	-1.00298
				23		1.2
				18		1.9				6 / 2cm	30
				21		2.3
				23.5		1.6				7 / 2cm	35
				27.5		1.3
11	7	20	59	14	16.3571	1.5	2.1	6	1	9 / 5cm	18	15.3333	54.0483	-1.00302
				16.5		2.6
				15		1.9				8 / 5cm	16
				9.5		3.8
				21		1.6				6 / 5cm	12
				18.5		1.2
11	8	32.5	52	14.5	13.2143	2.3	1.65	4	1	3 / 2cm	15	18.3333	54.0483	-1.00303
				25		1.9
				7.5		1.7				3 / 2cm	15
				13		2.1
						1.9				5 / 2cm	25
11	9	25	31	16	17.2143	1.5	1.48333	5	2	5 / 2cm	25	31.6667	54.0483	-1.00304
				14.5		1.5
				17.5		1.3				8 / 2cm	40
				19		1.6
				18		1.5				6 / 2cm	30
				10.5		1.5
11	10	26	11	20	15.6429	1.2	1.26667	1	2	7 / 2cm	35	36.6667	54.0483	-1.00306
				6		1
				17.5		1.7				8 / 2cm	40
				17		1.2
				23		1.6				7 / 2cm	35
						0.9
Kidney Pond	1	30	73	15	14.5	1.7	1.58333	8	1	10 / 5cm	20	20.6667
				17		2.4
				8.5		1.1				6 / 5cm	12
				10		1.5
				13.5		1.3				6 / 2cm	30
				7.5		1.5
Kidney Pond	2	22	36	17	9.5	1.5	0.816667	3	1	5 / 2cm	25	17.6667
				9.5		1.2
				18		1.1				4 / 5cm	8
						1.1
										4 / 2cm	20
Kidney Pond	3	51	124	46	35.1429	1.2	1.58333	21	1	8 / 5cm	16	23
				47		2
				42.5		1.6				9 / 5cm	18
				18		2.1
				25		1.2				7 / 2cm	35
				16.5		1.4
Kidney Pond	4	35	47	27	20.1571	1.4	1.48333	4	1	6 / 2cm	30	28.3333
				20.5		1.2
				2.6		1.2				5 / 2cm	25
				14.5		1.5
				22		1.7				6 / 2cm	30
				19.5		1.9
Kidney Pond	5	47	29	24	29.8571	1.9	1.98333	3	1	6 / 5cm	12	12.6667
				17.5		1.6
				28.5		1.9				6 / 5cm	12
				33		2.4
				35.5		2.2				7 / 5cm	14
				23.5		1.9
Kidney Pond	6	46	89	26.5	27.8571	1.4	1.55	18	1	9 / 5cm	18	18
				24		1.5
				33		1.5				12 / 5cm	24
				35		1.4
				19		1.7				6 / 5cm	12
				11.5		1.8
Kidney Pond	7	54	82	44	35.3571	1.6	1.51667	14	1	6 / 2cm	30	20
				37.5		1.6
				32.5		1.6				4 / 2cm	20
				22		1
				27		1.1				5 / 5cm	10
				30.5		2.2
Kidney Pond	8	34	70	15	22	1.5	1.9	9	1	6 / 5cm	12	17.6667
				18.5		1.7
				17		1.8				5 / 2cm	25
				22		1.6
				27.5		2.3				8 / 5cm	16
				20		2.5
Kidney Pond	9	58	76	30	36.1429	1.4	1.51667	12	1	7 / 2cm	35	28
				28		1.7
				19.5		1.3				5 / 2cm	25
				17.5		1.2
				48		1.6				12 / 5cm	24
				52		1.9
Kidney Pond	10	18	37	14.5	15.8571	1.4	1.71667	12	1	10 / 5cm	20	28.3333
				15		1.8
				18		1.4				6 / 2cm	30
				13.5		2.1
				18		1.9				7 / 2cm	35
				14		1.7
Kidney Pond	11	22	34	15	14.5714	2	1.9	4	2	7 / 5cm	14	11.3333
				11.5		1.6
				10.5		1.8				5 / 5cm	10
				12		1.6
				14		2.8				5/ 5cm	10
				17		1.6
Kidney Pond	12	26	43	21.5	18.7857	2	1.65	8	1	7 / 5cm	14	13.3333
				16		1.7
				14		1.3				6 / 5cm	12
				13.5		1.6
				17.5		1.9				7 / 5cm	14
				23		1.4
Kidney Pond	13	37	26	23	23.5714	0.9	1.31667	6	1	6 / 2cm	30	33.3333
				19.5		1.5
				27		1.5				7 / 2cm	35
				31.5		1.6
				12.5		1.2				7 / 2cm	35
				14.5		1.2
Kidney Pond	14	24	64	15	18	1.7	1.78333	16	1	7 / 10cm	7	10.3333
				12.5		1.8
				21		2.1				7 / 5cm	14
				20		2.4
				15.5		1.3				5 / 5cm	10
				18		1.4
Kidney Pond	15	47	22	26	33.7857	1.2	1.11667	10	1	4 / 2cm	20	16.6667
				31.5		1.4
				34		1.2				9 / 5cm	18
				22.5		1.1
				34.5		1				6 / 5cm	12
				41		0.8
Kidney Pond	16	20	43	13.5	13.7857	1.8	1.41667	15	2	9 / 5cm	18	20.6667
				10.5		1.4
				16		1.1				6 / 2cm	30
				9.5		1.4
				14		1.3				7 / 5cm	14
				13		1.5
Kidney Pond	17	28	31	22.5	20.9286	1.6	1.7	13	1	8/ 5cm	16	15.3333
				16		1.9
				15.5		2				7 / 5cm	14
				25		1.6
				18		1.4				8 / 5cm	16
				21.5		1.7
Kidney Pond	18	24	41	19.5	14.0714	1.6	1.36667	7	1	5 / 2cm	25	30
				15		1.2
				12.5		1.4				7 / 2cm	35
				7.5		1.3
				9		1.5				6 / 2cm	30
				11		1.2
Kidney Pond	19	31	35	16.5	20.5	1.6	1.48333	6	2	11 / 5cm	22	18
				19		1.5
				24		1.5				8 / 5cm	16
				17.5		1.2
				20.5		1.7				8 / 5cm	16
				15		1.4
Kidney Pond	20	44	39	36	30.0714	1.3	1.31667	11	1	3 / 2cm	15	23.3333
				24.5		1.5
				32.5		1.2				5 / 2cm	25
				21		1
				25		1.4				6 / 2cm	30
				27.5		1.5
Wild Goose Carr	1	12	11	7.5	4.28571	2	1.01667	1	1	8 /5cm	18	27.6667
				6		0.8
				4.5		0.9				6 / 2cm	30
						1.1
						1.3				7 / 2cm	35
Wild Goose Carr	2	25	27	22.5	17.8571	2.2	2.15	3	1	12 / 5cm	24	21.3333
				11		2.1
				13		1.9				9 / 5cm	18
				20.5		2.6
				17		2.1				11 / 5cm	22
				16		2
Wild Goose Carr	3	32	46	26.5	20.5	2.1	1.9	11	2	7 / 5cm	14	15.3333
				22		1.8
				14		2				8 / 5cm	16
				12.5		2
				17		1.9				8 / 5cm	16
				19.5		1.6
Wild Goose Carr	4	29	47	23	24.2857	2.3	2.05	7	1	13 / 10cm	13	10.6667
				25.5		2.2
				26		2.2				7 / 5cm	14
				27.5		2
				15		2				5 / 10cm	5
				24		1.6
Wild Goose Carr	5	34	84	26	25	2.6	2	20	1	9 / 5cm	18	16.3333
				25		2
				23.5		1.2				12 / 5cm	24
				21		1.5
				27.5		2.8				7 / 10cm	7
				18		1.9
Wild Goose Carr	6	22	64	2	15.9286	2.7	2.1	8	1	9 / 10cm	9	6.66667
				16.5		1.9
				13		2.2				5 / 10cm	5
				17		2.8
				20		1.7				6 / 10cm	6
				21		1.3
Wild Goose Carr	7	30	100	18.5	20.2857	1.8	2.18333	13	1	14 / 10cm	14	21
				12		2
				26		2.3				16 / 5cm	32
				20		2.4
				20		2.4				17 / 10cm	17
				15.5		2.2
Wild Goose Carr	8	50	73	27	26.2143	2.4	2.1	6	1	14 / 10cm	14	15.3333
				42		2.7
				10.5		1.5				9 / 5cm	18
				12		1.2
				25		1.9				7 / 5cm	14
				17		2.9
Wild Goose Carr	9	25	45	4.5	15.2857	1.8	1.66667	4	1	6 / 5cm	12	12.6667
				7		1.6
				18.5		1.9				12 / 10cm	12
				17		1.4
				18		1.3				7 / 5cm	14
				17		2
Wild Goose Carr	10	44	85	28	28.4286	1.4	1.56667	7	1	8 / 5cm	16	18.3333
				34.5		2.3
				37		1.1				7 / 5cm	14
				17		1.4
				15.5		1.5				5 / 2cm	25
				23		1.7
Wild Goose Carr	11	23	64	14.5	15.7857	1.9	1.48333	5	1	8 / 2cm	40	36.6667
				19		1.1
				16.5		1.9				8 / 2cm	40
				10		1.4
				15.5		1.3				6 / 2cm	30
				12		1.3
Wild Goose Carr	12	34	82	18	22.2143	2.1	1.85	10	1	9 / 2cm	45	25.6667
				21.5		1.4
				17.5		2				11 / 5cm	22
				27.5		2.3
				23		1.7				10 / 10cm	10
				14		1.6
Wild Goose Carr	13	21	28	15	16.1429	1.4	1.53333	4	1	9 / 5cm	18	19.6667
				13		1.7
				19.5		2.1				8 / 5cm	16
				20		1.4
				11.5		1.5				5 / 2cm	25
				13		1.1
Wild Goose Carr	14	16	6	10	3.71429	2	0.65	1	1	5 / 5cm	10	10
						1.9
										5 / 5cm	10
Wild Goose Carr	15	27	20	19.5	17.4286	1.6	1.63333	3	1	3 / 5cm	6	12
				15		1.5
				18.5		1.5				2 / 2cm	10
				17		2.1
				9.5		1.4				4 / 2cm	20
				15.5		1.7
Wild Goose Carr	16	30	51	21.5	21.7857	1.5	1.48333	7	1	10 / 10cm	10	12.3333
				26		1.3
				16		1.6				8 / 5cm	16
				15.5		1.4
				20		1.6				11 / 10cm	11
				23.5		1.5
Wild Goose Carr	17	25	53	21	19.2143	1.6	1.91667	12	1	13 / 10cm	13	13
				22		1.8
				15.5		1.5				6 / 5cm	12
				16		1.9
				16		2.5				7 / 5cm	14
				19		2.2
Wild Goose Carr	18	41	86	38.5	35.2857	1.4	1.66667	25	1	5 / 5cm	10	33.3333
				29		1.3
				22		1.8				8 / 2cm	40
				38		2
				38.5		1.8				10 / 2cm	50
				40		1.7
Wild Goose Carr	19	34	98	23	20.1429	2.5	1.98333	10	1	5 / 2cm	25	17
				25.5		1.8
				20		2.1				7 / 5cm	14
				13		1.6
				11		2.2				6 / 5cm	12
				14.5		1.7
Wild Goose Carr	20	33	61	27	24.6429	2	1.61667	8	1	10 / 5cm	20	17.3333
				28.5		1.4
				29		1.5				7 / 5cm	14
				21.5		1.4
				15		1.7				9 / 5cm	18
				18.5		1.7
Hotspot near junction of section 2 and 3	1	53	73	43	43.7143	1.5	1.7	12	3	5 / 2cm	25	36.6667
				40		1.7
				33		1.5				7 / 2cm	45
				36.5		2.2
				49		1.7				8 / 2cm	40
				51.5		1.6
Hotspot near junction of section 2 and 3	2	73	68	61	55.5714	1.9	1.96667	16	3	9 / 5cm	18	18
				56.5		1.8
				57		1.6				11 / 5cm	22
				44		2
				39		2.1				7 / 5cm	14
				58.5		2.4
Hotspot near junction of section 2 and 3	3	88	124	69	65.3571	2.4	1.83333	13	2	10 / 5cm	20	18.6667
				60		1.9
				56.5		1.7				6 / 5cm	12
				50		1.8
				55.5		1.6				12 / 5cm	24
				78.5		1.6
Hotspot near junction of section 2 and 3	4	64	115	53.5	44.5	1.8	1.85	10	3	12 / 5cm	24	21.3333
				48		1.5
				45.5		2.1				11 / 5cm	22
				48		1.8
				24		2				9 / 5cm	18
				28.5		1.9

## Sheet: 2005 patch density
2005 Salix repens patch density surveys. Measures are numbers of patches in the relevant transect section.
Easting_start	Northing_start	Easting_1	Northing_1	0-49m	Easting_2	Northing_2	50-99m	Easting_3	Northing_3	100-149m	Easting_4	Northing_4	150-199m
465133	461030	465158	461030	5	465208	461030	0	465258	461030	16	465308	461030	23
465409	461861	465434	461861	27	465484	461861	51	465534	461861	29	465584	461861	33
465477	461687	465502	461687	8	465552	461687	7	465602	461687	6	465652	461687	2
465121	460897	465146	460897	7	465196	460897	24	465246	460897	0	465296	460897	0
465937	460406	465962	460406	6	466012	460406	2	466062	460406	2	466112	460406	0
465128	461677	465153	461677	11	465203	461677	15	465253	461677	26	465303	461677	36
465496	460704	465521	460704	0	465571	460704	0	465621	460704	0	465671	460704	1
465754	461083	465779	461083	7	465829	461083	10	465879	461083	10	465929	461083	13
465652	461143	465677	461143	3	465727	461143	3	465777	461143	7	465827	461143	4
465662	460222	465687	460222	0	465737	460222	0	465787	460222	0	465837	460222	0
465416	460325	465441	460325	0	465491	460325	0	465541	460325	0	465591	460325	0
465319	461038	465344	461038	2	465394	461038	0	465444	461038	14	465494	461038	8
465762	460287	465787	460287	0	465837	460287	0	465887	460287	1	465937	460287	0
464976	461181	465001	461181	0	465051	461181	0	465101	461181	0	465151	461181	4
465197	460928	465222	460928	71	465272	460928	36	465322	460928	8	465372	460928	0
465083	461581	465108	461581	0	465158	461581	6	465208	461581	10	465258	461581	13
464774	461472	464799	461472	2	464849	461472	8	464899	461472	6	464949	461472	1
464910	460862	464935	460862	0	464985	460862	0	465035	460862	0	465085	460862	0
465193	461701	465218	461701	6	465268	461701	24	465318	461701	24	465368	461701	16
465494	460572	465519	460572	0	465569	460572	0	465619	460572	0	465669	460572	4
464893	461141	464918	461141	0	464968	461141	0	465018	461141	0	465068	461141	0
466503	460680	466528	460680	0	466578	460680	0	466628	460680		466678	460680		Missing data indicates random transect reaches limit of study site
466377	460503	466402	460503	0	466452	460503	0	466502	460503	0	466552	460503		Missing data indicates random transect reaches limit of study site
465586	461596	465611	461596	0	465661	461596	0	465711	461596	1	465761	461596	6
465863	461107	465888	461107	6	465938	461107	12	465988	461107	21	466038	461107	2
464906	460847	464931	460847	0	464981	460847	0	465031	460847	0	465081	460847	0
465754	461533	465779	461533	30	465829	461533	34	465879	461533	3	465929	461533	11
465549	461562	465574	461562	0	465624	461562	0	465674	461562	2	465724	461562	6
465647	461721	465672	461721	0	465722	461721	0	465772	461721	31	465822	461721	4
465750	461694	465775	461694	0	465825	461694	0	465875	461694	1	465925	461694	4
465768	461256	465793	461256	8	465843	461256	1	465893	461256	3	465943	461256	4
465525	460669	465550	460669	0	465600	460669	0	465650	460669	1	465700	460669	0
465608	461848	465633	461848	7	465683	461848	4	465733	461848	4	465783	461848	0
465808	460924	465833	460924	0	465883	460924	1	465933	460924	2	465983	460924	3
464887	461245	464912	461245	0	464962	461245	6	465012	461245	0	465062	461245	5
466164	460915	466189	460915	2	466239	460915	0	466289	460915	0	466339	460915	0
465583	461904	465608	461904	7	465658	461904	15	465708	461904	2	465758	461904	0
465520	461351	465545	461351	14	465595	461351	15	465645	461351	35	465695	461351	3
465899	460482	465924	460482	0	465974	460482	0	466024	460482	0	466074	460482	0
465425	461840	465450	461840	6	465500	461840	27	465550	461840	36	465600	461840	27
465282	461775	465307	461775	0	465357	461775	6	465407	461775	0	465457	461775	0
465193	461212	465218	461212	0	465268	461212	17	465318	461212	17	465368	461212	35
465079	460639	465104	460639	0	465154	460639	0	465204	460639	0	465254	460639	4
465197	461103	465222	461103	4	465272	461103	1	465322	461103	9	465372	461103	24
465994	459951	466019	459951	0	466069	459951	0	466119	459951	0	466169	459951	0
465325	460799	465350	460799	0	465400	460799	10	465450	460799	1	465500	460799	0
466039	460607	466064	460607	0	466114	460607	0	466164	460607	0	466214	460607	0
465326	461803	465351	461803	0	465401	461803	0	465451	461803	5	465501	461803	21
465181	461378	465206	461378	0	465256	461378	0	465306	461378	6	465356	461378	3
464823	461501	464848	461501	11	464898	461501	15	464948	461501	10	464998	461501	2

## Sheet: 2005 patch morphology
Morphological measures of Salix repens patches in 2005, for patches with Epione vespertaria larvae and those without
ID	Easting	Northing	LARVA	WIDTH_MX	HGHT_MX	HGHT_1	HGHT_2	HGHT_3	HGHT_4	HGHT_5	HGHT_6	HGHT_X	STEM_NO	LFLEN_1	LFLEN_2	LFLEN_3	LFLEN_4	LFLEN_5	LFLEN_6	LFLEN_X	LFDENS_1	LFDENS_2	LFDENS_3	LFDENS_X
312	65276	60988	1	108	54	39	35.5	40	47	38.5	38	41.7143	11	18.2	28.2	16.8	24.9	12.6	17.1	19.6333	18	18	13	16.3333
338	65241	60944	1	280	84.5	56	58	41.5	56	49	37	54.5714	66	13.7	24.4	16.8	24.1	19.7	22.3	20.1667	8	11	8	9
339	65254	60937	1	160	48.5	44	41	38.5	25	37.5	26.5	37.2857	33	16.5	14.7	9.4	13	12.1	9.4	12.5167	15	20	20	18.3333
1001	65244	60952	1	341	80.5	73	73	54	45	52	73	64.3571	89	21.9	19.3	25.9	20.5	19	23.1	21.6167	13	18	8	13
1002	65254	60964	1	292	68.5	45	67	54	52	60	45	55.9286	51	19.4	24.9	21.8	14.9	23.9	14.9	19.9667	13	16	18	15.6667
1004	65589	61844	1	238	37	30	24	31.5	23	35	31	30.2143	61	8.4	12.4	8.7	8.7	9.9	13.9	10.3333	24	35	40	33
1005	65382	61851	1	65	28.5	29	29	24.2	26.5	23	23.75	26.2786	14	15.1	13.7	11.8	12.4	15.6	12.4	13.5	18	28	24	23.3333
1006	65530	61846	1	64	30	23.5	19.5	18	11.5	15.5	14	18.8571	8	17.3	19.9	16.2	16.9	12.2	20.4	17.15	20	18	11	16.3333
1007	65206	60929	1	300	127.5	24.8	33.2	25.7	19	16.2	20.8	38.1714	123	24.8	33.2	25.7	19	16.2	20.8	23.2833	22	7	10	13
1008	65207	60920	1	85	137.5	105.5	114	98	115	117	94	111.571	82	37.4	26.9	34.8	27.9	23.5	31.3	30.3	6	11	11	9.33333
1009	65210	60920	1	193	306.5	82	114	116.5	95.5	121	116	135.929	69	28.8	38.7	23.4	32.7	26	21.3	28.4833	7	14	13	11.3333
1010	65203	60921	1	268	34	22	26	28.5	16.5	24	18.5	24.2143	83	20.9	27.1	17.7	22.1	18.6	20.5	21.15	18	10	8	12
1011	65200	60905	1	180	69	63	66	57.5	46.5	52	55	58.4286	23	18.6	33.3	18.4	27.5	27.6	16.8	23.7	8	15	8	10.3333
1012	65193	60920	1	92	68	56	62	62	50	64.5	61	60.5	9	17.5	26	18.9	25.8	16.2	15.9	20.05	14	12	10	12
1013	65179	60923	1	96.5	96	83	70	63	59	38.5	58	66.7857	26	23.7	24.8	21.4	22.4	19.6	22.4	22.3833	10	20	14	14.6667
1014	65185	60932	1	137	58.5	39.5	29.5	44.5	54	30	27.5	40.5	19	23.5	23.8	26.5	20.4	17.4	21.4	22.1667	15	12	12	13
1015	65184	60929	1	530	112	82	54	109	69	52	73	78.7143	315	19.4	21.4	21.9	17.4	17	22.8	19.9833	13	10	16	13
1016	65185	60892	1	238	94	71.5	73	92	84.5	69.5	62.5	78.1429	32	24.1	26	22.6	30.5	20	21	24.0333	6	8	10	8
1017	65185	60892	1	94	78.5	66.5	60	70	57	49	63	63.4286	8	18.8	24	30.8	17.9	25.6	34.7	25.3	7	12	10	9.66667
1018	65228	60916	1	121	46	43.5	44	41	39	33	36	40.3571	9	19.3	12.6	18.1	17.6	16.9	14.1	16.4333	25	7	22	18
1019	65224	60913	1	203	92.6	55.5	59	52.5	57	75	60.5	64.5857	64	20.4	15.9	17.7	21.9	18.4	15.9	18.3667	20	18	6	14.6667
1020	65205	60927	1	205	63	55.5	46.5	45	39	42	41	47.4286	4	24.1	18.6	26.1	17.7	24	26	22.75	9	12	8	9.66667
1021	65217	60943	1	107	44	42.5	40	40	41	33	37	39.6429	27	14.7	19.9	18	19.7	20.9	17.1	18.3833	14	20	20	18
1022	65225	60954	1	96.5	69	62.5	49.5	53.5	48	40	27	49.9286	13	11.7	20.1	10.8	19	13.4	21.5	16.0833	16	14	16	15.3333
1023	65243	60957	1	121.5	67	33	37.5	23.5	38.5	38	26	37.6429	13	26.2	20.9	19.9	23.3	19.9	22.2	22.0667	10	12	11	11
1024	65282	60986	1	123	43	39.5	30.5	38	40.5	37	38	38.0714	8	15.8	12.4	22.3	27.8	35	30.9	24.0333	8	14	18	13.3333
1025	65273	60993	1	95	62	60	54	44	50	53	56.5	54.2143	28	18.6	20.1	19.7	13.3	13.9	15	16.7667	14	22	27.5	21.1667
1026	65326	61035	1	177	49.5	40.5	42.5	43	24	15	42.25	36.6786	12	18.3	29.6	18.4	31.8	19.8	25	23.8167	11	14	16	13.6667
1027	64962	61242	1	215	54	37	36	35	48	36.5	21.5	38.2857	56	23.8	14.9	20.5	15.8	13.3	20.4	18.1167	8	14	22	14.6667
1028	65048	61252	1	19	36	29	26	28	32	29	27	29.5714	1	24.1	20.8	16.3	21.4	13.7	13.6	18.3167	15	15	15	15
1029	65084	61254	1	140	60	50	52	46	37	23	40	44	27	16.8	25.7	18.1	25.4	17.1	16.8	19.9833	22	12	12.5	15.5
1030	65243	61321	1	119	32	28	25	22	25	28	10	24.2857	20	22.6	21.1	25.3	16.6	31.3	26.4	23.8833	8	16	14	12.6667
147	65562	61379	0	197	34.5	34	31	30.5	24	25	29.5	29.7857	60	11.8	17.2	14.1	14.7	15.6	12.9	14.3833	9	11	14	11.3333
311	65209	60983	0	57	65.5	47.5	44	44	46.5	45.5	49.5	48.9286	2	13	11.2	15.9	14.7	17.2	13.1	14.1833	20	27.5	8	18.5
241	65302	61107	0	63	36	32	32	11	9.5	9	16.5	20.8571	6	5.2	12.3	13.9	8.7	11.1	9.4	10.1	22.5	40	20	27.5
285	65266	61031	0	100	28.5	27	25	14	23	21.5	10	21.2857	9	10.3	14.9	13.8	15.3	15.3	12.7	13.7167	14	28	70	37.3333
310	65199	60977	0	53	50	48.5	41	47.5	35	32	28.5	40.3571	3	12.2	14.9	12.1	13.7	15	9.9	12.9667	24	20	20	21.3333
337	65191	60928	0	461	130	78.5	99	85.5	81	80	64	88.2857	182	23.2	19.8	17	23.7	24.3	25.5	22.25	9	9	12	10
262	65358	61078	0	14	15	13	13	13.5	10.5	14	9	12.5714	3	10.6	8.9	8.1	9.1	7.6	6.3	8.43333	55	20	50	41.6667
222	65290	61160	0	156	39.5	27.5	27	36.5	21	26	28.5	29.4286	10	18.5	11.7	14.2	15.3	16.6	13.4	14.95	20	12	30	20.6667
237	65112	61119	0	100	10	10	9	8	7	7.5	8	8.5	46	13.9	10	11.6	11.5	15.7	11.7	12.4	17.5	14	32	21.1667
30	65391	61737	0	34	30	23.5	18	14	29	30		24.0833	5	13.3	9.3	10.5	13.4	12.1	11.7	11.7167	34	50	40	41.3333
60	65349	61634	0	120	61	46	47.5	32	21	39.25	23.5	38.6071	7	21.9	20.5	17.7	14	17.9	18.5	18.4167	16	10	15	13.6667
91	65257	61499	0	62	27	19.5	16.5	17	25	27		22	5	16.2	8.7	7.5	7.6	7.2	11.8	9.83333	30	47	50	42.3333
84	64891	61535	0	102	35.5	35	22	31	25	24.5	19	27.4286	8	13.7	13.4	18.3	16.7	14.9	8.4	14.2333	14	18	22.5	18.1667
0	65556	61907	0	65	37	26.5	15.5	13.5	28	19.5	15	22.1429	6	12.4	14	12.4	14.1	14.4	16.9	14.0333	22	18	18	19.3333
2	65503	61897	0	116	32	25.5	26	25.5	27	26	20.5	26.0714	18	12.5	12.3	10.8	13.3	19.5	12.1	13.4167	25	28	28	27
4	65580	61894	0	44.5	18	16	14.5	15.5	15.5	8	12	14.2143	3	15.9	11.4	10.3	10.2	8.7	10.8	11.2167	30	34	44	36
23	65687	61796	0	122	28.25	21	28	19	19.5	11.5	18	20.75	15	9.1	12.9	9.3	12.6	12.2	16.4	12.0833	36	34	37.5	35.8333
20	65548	61791	0	81	35.25	25.5	24.5	30.5	27.75	22	25	27.2143	10	12.4	15.7	11.3	15	13.3	9.1	12.8	18	22	42	27.3333
8	65419	61837	0	66	35	23.5	25.5	20	31.75	14	26	25.1071	16	15.4	16.8	13.2	12.7	13.3	13.1	14.0833	20	18	20	19.3333
103	65888	61510	0	70	18.5	15.5	14	12	11	14.5	15	14.3571	15	11.3	9	12	12.5	9.4	10.1	10.7167	16	27.5	20	21.1667
134	65644	61432	0	45	39.5	27	28	29	33	26	21	29.0714	8	15.9	17.9	17.7	17	16.4	13.5	16.4	10	20	14	14.6667
127	65315	61420	0	197	36.5	32	32.5	30.5	26.5	25	29	30.2857	18	22.1	17.1	22.2	25.8	21.3	19.9	21.4	10	14	20	14.6667
182	65264	61267	0	205	59	54.5	34	41	36	36	35.5	42.2857	160	11.4	12	14.8	13	14.3	17.6	13.85	9	18	11	12.6667
210	65556	61202	0	90	25.5	15.5	14	19	20	13	6	16.1429	4	15.4	13.1	9.8	15.1	15.4	16.8	14.2667	12	14	22.5	16.1667
192	65786	61270	0	69	32	6.5	32	24.5	8	20	18	20.1429	21	13.3	11.5	12.7	18.9	16.3	25.6	16.3833	8	8	14	10
188	65592	61288	0	230	41.5	32.5	35	35	23.5	26.5	31.5	32.2143	110	20.5	21.7	24.5	17.3	18.2	18.2	20.0667	20	8	12	13.3333
254	65953	61115	0	77.5	55	43	35.5	36.5	31	29	25.5	36.5	11	17.5	11	8.7	8.9	11.5	16.4	12.3333	22.5	15	25	20.8333
318	65991	60202	0	76.5	18	16.5	16.5	19.5	17.5	11	13	16	21	15.4	10.7	9	11.3	20	13.1	13.25	27.5	35	20	27.5
406	65671	60610	0	53.5	27	27	20	20	20	16	9.5	19.9286	6	11.1	11.6	8.2	17.1	17.8	10.9	12.7833	45	14	16	25
114	65473	61455	0	134	31	35	27.5	28	22	20.5	16	25.7143	23	12.5	14.3	8.9	9.5	12.1	11	11.3833	22	25	25	24
231	65730	61182	0	80	21	11	8	14	13	11	9	12.4286	60	14.1	24.4	20.7	14.7	32.9	11.6	19.7333	12	12.5	30	18.1667
351	66184	60910	0	102	41	38	33	27.5	22	28	25.5	30.7143	85	16.8	20.3	13.8	13.9	21	15.3	16.85	10	27.5	17.5	18.3333
